# Supplementary material
Source: Research Square preprint supplement (doi:10.21203/rs.3.rs-7328143/v1)
Supplement: Supplementary file 1 [file e2ac3e2bec58505a9c05e014.docx]

**Table 1** Malt quality linked SSR marker used for genotypic the cultivars.

| SSR marker | Trait | Chrom. Location | Forward sequence | Reverse sequence | No. of repeats | Product size | Ta | reference |
| --- | --- | --- | --- | --- | --- | --- | --- | --- |
| AWBMS80 | ME, Dp | 1HS | GCTTTCAGCATCTCAACTGCG | TGTATGCCAGGAAAACGGAACC | (CT)11 | 186 | 60°C | Hearnden et al. (2007) |
| Bmac90 | ME, Dp | 1HS | ACATCAACCCTCCTGCTC | CCGCACATAGTGGTTACATC | (AC)20 | 221 | 58°C | Wenzl et al. (2006) |
| EBmac501 | ME, Dp | 1HS | ACTTAAGTGCCATGCAAAG | AGGGACAAAAATGGCTAAG | (AC)13 | 151 | 58°C | Wenzl et al. (2006) |
| HVM2 | ME, Dp | 1HS | CAGGTGTCTAGTGGGTGCCT | TTACATACCAAGGAGCAATCCC | (GA)11 | 201 | 55°C | Liu et al.1996 |
| HVALAAT | ME, Dp | 1HS | TACATACAACCCTCATGGG | AAGGATGACATGGCTTTG | (CT)10 | 128 | 55°C | Wenzl et al. (2006); Pillen et al. (2000). |
| HVM20 | ME, Dp power | 1HS | CTCCACGAATCTCTGCACAA | CACCGCCTCCTCTTTCAC | (GA)19 | 510 | 55°C | Saghai Maroof et al. (1994) |
| Bmag692 | Malt extract | 2Hl | GCAAGGTATCTCTTGTATTTTG | TGGCATCTACAATCTAAAACA | (CT)19 | 182 | 55°C | Ramsay et al. (2000); |
| HVM36 | Malt extract | 2HS | TCCAGCCGACAATTTCTTG | AGTACTCCGACACCACGTCC | (GA)13 | 114 | 55°C | Saghai Maroof et al. (1994) |
| Bmac134 | Malt extract | 2Hs | CCAACTGAGTCGATCTCG | CTTCGTTGCTTCTCTACCTT | (AC)28 | 148 | 55°C | Varshney et al. (2007) |
| HVM54 | Malt extract | 2HL | AACCCAGTAACACCTGTCCTG | AGTTCCCTGACCCGATGTC | (GA)14 | 159 | 55°C | Saghai Maroof et al. (1994) |
| EBmac415 | Malt extract | 2HL | GAAACCCATCATAGCAGC | AAACAGCAGCAAGAGGAG | (AC)17 | 247 | 55°C | Ramsay et al.( 2000);Varshney et al. (2007) |
| EBmac541 | Diastatic power | 3HL | ACGGATCTACTTTAGCTAGCA | AAACAACCCCACACAATC | (AC)9 | 106 | 58°C | Varshney et al. (2007) |
| Bmag877 | Diastatic power | 3HL | AAAGCTCATGGTAGATCAAGA | TAGTTTTCCCAAAAGCTTCTA | (GA)15 | 153 | 55°C | Ramsay et al. (2000); |
| HVM67 | Diastatic power | 4HL | GTCGGGCTCCATTGCTCT | CCGGTACCCAGTGACGAC | (GA)11 | 116 | 55°C | Saghai Maroof et al. (1994) |
| HVM6 | ME, Dp | 5HL | CATGAATGAATGATTGGTTTTG | CGCATCCGTATGTATGAGTAA | (GA)9 | 175 | 55°C | Saghai Maroof et al. (1994) |
| GMS1 | ME, Dp | 5HL | CTGACCCTTTGCTTAACATGC | TCAGCGTGACAAACAATAAAGG | (CT)7 TTT(CT)27 | 134 | 60°C | Struss and Plieske ,(1998) |
| HvAMY2 | Diastatic power | 7HS | CTGTAAGTGAGACAATCGACA | CAGTTGAACCCCTGAAAG | (GCT)5 | 134 | 58°C | Ramsay et al. (2000); |
| HvBTAI3 | α-amylase inhibitor | 4HL | GCCGCAGTCTCCTCCTCTTG | ACTTGGCGAGGTATGGCTGC | (GCC)4 | 234 | 50°C | Pillen et al.(2000) |
| HdAMYB | ß-Amylase (Bmy1) | 4HL | GCACCAGACAGTTCACCCATA | CATATATGGTCTCCCGGAAGG | (TG)10 (G)15 | 219 | 50°C | Pillen et al. 2000; Ramsay et al. (2000). |

| HvBAMY | 5-Upsteam region of beta- amylase | 4HL | CAAGCAAAAGGTTAAAGGTG CC | TTGTCGAAACCCATCCGCTC | (AT)9 | 118-145 |  | Mei, et al.(2012) |
| --- | --- | --- | --- | --- | --- | --- | --- | --- |
| HVCMA | Alpha-amylase inhibitor | 7HL | GCCTCGGTTTGGACATATAA AG | GTAAAGCAAATGTTGAGCAACG | (AT)9 | 117-132 |  | Mei, et al.(2012) |

Table 2 Summary AMOVA showing partitioning of genetic variations within and among individuals and populations.

| Summary AMOVA Table | |  |  |  |  |
| --- | --- | --- | --- | --- | --- |
| Source | df | SS | MS | Est. Var. | %Variation |
| Among Pops | 1 | 20.576 | 20.576 | 0.078 | 1% |
| Among Indiv | 20 | 378.265 | 18.913 | 9.218 | 94% |
| Within Indiv | 22 | 10.500 | 0.477 | 0.477 | 5% |
| Total | 43 | 409.341 | 39.966 | 9.773 | 100% |

Df degree of freedom, SS sum of squares, MS mean square, Est. Var. estimated variation, PV percent of variation

Table 3 Summary of genetic diversity indices for the 21 malt quality linked marker.

| S/No | | Markers name | Chrs Pos | Na | Ne | Ho | He | uHe | I | Gst | F | Fis | Fit | Fst | PIC |
| --- | --- | --- | --- | --- | --- | --- | --- | --- | --- | --- | --- | --- | --- | --- | --- |
| 1 | AWBMS80 | | 1HS | 7.0 | 5.95 | 0.00 | 0.81 | 0.85 | 1.84 | 0.012 | 1.00 | 1.00 | 1.00 | 0.06 | 0.87 |
| 2 | BMAC90 | | 1HS | 9.0 | 8.95 | 0.00 | 0.89 | 0.93 | 2.22 | -0.012 | 1.00 | 1.00 | 1.00 | 0.04 | 0.92 |
| 3 | EBMAC501 | | 1HS | 6.0 | 5.84 | 0.00 | 0.83 | 0.87 | 1.81 | 0.005 | 1.00 | 1.00 | 1.00 | 0.05 | 0.87 |
| 4 | HVM2 | | 1HS | 8.0 | 7.06 | 0.00 | 0.86 | 0.90 | 2.02 | -0.018 | 1.00 | 1.00 | 1.00 | 0.03 | 0.88 |
| 5 | HVALAAT | | 1HS | 12.0 | 9.63 | 0.58 | 0.88 | 0.93 | 2.36 | 0.001 | 0.34 | 0.34 | 0.36 | 0.03 | 0.83 |
| 6 | HVM20 | | 1HS | 9.0 | 7.68 | 0.05 | 0.87 | 0.91 | 2.11 | -0.003 | 0.93 | 0.94 | 0.94 | 0.04 | 0.92 |
| 7 | BMAG692 | | 2HL | 7.0 | 5.84 | 0.00 | 0.83 | 0.87 | 1.85 | 0.000 | 1.00 | 1.00 | 1.00 | 0.05 | 0.87 |
| 8 | HVM36 | | 2HS | 10.0 | 9.07 | 0.09 | 0.88 | 0.92 | 2.24 | 0.011 | 0.89 | 0.89 | 0.89 | 0.06 | 0.93 |
| 9 | BMAC134 | | 2HS | 8.0 | 6.72 | 0.00 | 0.84 | 0.88 | 1.97 | -0.005 | 1.00 | 1.00 | 1.00 | 0.04 | 0.89 |
| 10 | HVM54 | | 2HL | 10.0 | 9.61 | 0.00 | 0.88 | 0.92 | 2.23 | 0.005 | 1.00 | 1.00 | 1.00 | 0.05 | 0.93 |
| 11 | EBMAC415 | | 2HL | 9.0 | 7.68 | 0.06 | 0.87 | 0.91 | 2.11 | 0.009 | 0.93 | 0.94 | 0.94 | 0.06 | 0.92 |
| 12 | EBMAC541 | | 3HL | 10.0 | 7.75 | 0.19 | 0.87 | 0.91 | 2.19 | 0.014 | 0.78 | 0.78 | 0.79 | 0.06 | 0.91 |
| 13 | BMAG877 | | 3HL | 5.0 | 4.09 | 0.00 | 0.75 | 0.79 | 1.54 | 0.032 | 1.00 | 1.00 | 1.00 | 0.08 | 0.82 |
| 14 | HVM67 | | 4HL | 6.0 | 5.04 | 0.00 | 0.79 | 0.84 | 1.72 | -0.009 | 1.00 | 1.00 | 1.00 | 0.04 | 0.83 |
| 15 | HVM6 | | 5HL | 7.0 | 6.05 | 0.00 | 0.83 | 0.87 | 1.89 | 0.006 | 1.00 | 1.00 | 1.00 | 0.05 | 0.88 |
| 16 | GMS1 | | 5HL | 6.0 | 5.11 | 0.00 | 0.80 | 0.84 | 1.74 | -0.013 | 1.00 | 1.00 | 1.00 | 0.04 | 0.83 |
| 17 | HVAMY2 | | 7HS | 8.0 | 7.56 | 0.00 | 0.86 | 0.91 | 2.07 | 0.002 | 1.00 | 1.00 | 1.00 | 0.05 | 0.91 |
| 18 | HVBTAI3 | | 4HL | 7.0 | 6.06 | 0.00 | 0.83 | 0.87 | 1.84 | 0.006 | 1.00 | 1.00 | 1.00 | 0.05 | 0.88 |
| 19 | HDAMYB | | 4HL | 7.0 | 6.24 | 0.00 | 0.84 | 0.88 | 1.89 | -0.007 | 1.00 | 1.00 | 1.00 | 0.04 | 0.87 |
| 20 | HVBAMY | | 4HL | 7 | 6.374 | 0.000 | 0.839 | 0.881 | 1.917 | -0.016 | 1.000 | 1.000 | 1.000 | 0.033 | 0.87 |
| 21 | HVCMA | | 7HL | 5 | 4.607 | 0.000 | 0.722 | 0.757 | 1.478 | 0.073 | 1.000 | 1.000 | 1.000 | 0.122 | 0.84 |
| Minimum | | | | 5 | 4.09 | 0 | 0.722 | 0.757 | 1.48 | -0.018 | 0.34 | 0.339 | 0.62 | 0.032 | 0.82 |
| Maximum | | | | 12 | 9.634 | 0.585 | 0.888 | 0.932 | 2.36 | 0.073 | 1 | 1 | 1 | 0.122 | 0.92 |
| Average | | | | 8 | 6.807 | 0.047 | 0.837 | 0.878 | 1.95 | 0.004 | 0.947 | 0.947 | 0.949 | 0.052 | 0.880 |

Na = No. of Different Alleles, Ne = No. of Effective Alleles = 1 / (Sum pi^2), I = Shannon's Information Index = -1* Sum (pi * Ln (pi)), Ho = Observed Heterozygosity = No. of Hets / N, He = Expected Heterozygosity = 1 - Sum pi^2 , uHe = Unbiased Expected Heterozygosity = (2N / (2N-1)) * He, F = Fixation Index = (He - Ho) / He = 1 - (Ho / He), Fis = (Mean He - Mean Ho) / Mean He, Fit = (Ht - Mean Ho) / Ht, Fst = (Ht - Mean He) / Ht, Nm = [(1 / Fst) - 1] / 4

**Table 4** Malt quality traits performance of Ethiopian malt barley cultivars.

| Cultivars | Β-glucan content (Mean ±SE) | | Extract content (Mean ±SE) | Friability  (Mean ±SE) | Hectoliter (kg/l). Weight(g) | Moisture content (%) | Protein content (%) |
| --- | --- | --- | --- | --- | --- | --- | --- |
| Focus | 231 ±54.51 | 81.8± 0.84 | | 73.8±6.7245 | 68.6±1.6612 | 11.7±0.172234 | 8.89±0.6691 |
| Explorer | 280 ±54.512 | 81.1± 0.834 | | 81.9±6.725 | 65.8±1.6612 | 11.7±0.172234 | 10.13±0.669123 |
| Henerike | 292 ±54.5123 | 78.9± 0.81234 | | 57.3±6.7212345 | 66.7±1.6612 | 10.9±0.17212 | 10.94±0.6691234 |
| Planet | 343 ±54.51234 | 80.5± 0.8234 | | 65.1±6.722345 | 66.7±1.6612 | 11.7±0.172234 | 9.45±0.66912 |
| Fatima | 378 ±54.512345 | 81.6± 0.834 | | 67.5±6.722345 | 66.4±1.6612 | 11.8±0.172234 | 9.47±0.66912 |
| Traveller | 419 ±54.5123456 | 81.6± 0.834 | | 71.4±6.72345 | 68.1±1.6612 | 11.7±0.172234 | 10.12±0.669123 |
| HB-52 | 441 ±54.5123456 | 77.8± 0.81234 | | 25.1±6.721 | 71.0±1.6612 | 12.1 ±0.1724 | 11.96±0.669234 |
| Proctor | 445 ±54.5123456 | 78.5± 0.81234 | | 49.8±6.7212345 | 69.5±1.6612 | 11.5±0.1721234 | 10.49±0.669123 |
| Sabin | 480 ±54.5123456 | 80.6± 0.8234 | | 71±6.72345 | 69.3±1.6612 | 11.7±0.172234 | 10.15±0.669123 |
| Grace | 488 ±54.5123456 | 81± 0.834 | | 72.4±6.72345 | 66.0±1.6612 | 11.9±0.172234 | 10.39±0.669123 |
| EH-1847 | 547 ±54.523456 | 78.3± 0.81234 | | 46.7±6.721234 | 67.9±1.6612 | 11.3±0.1721234 | 12.77±0.66934 |
| HB-1963 | 551 ±54.523456 | 78.5± 0.81234 | | 48±6.721234 | 71.9±1.662 | 12.0±0.17234 | 10.78±0.6691234 |
| Beka | 559 ±54.523456 | 79.1± 0.81234 | | 48.5±6.7212345 | 70.5±1.6612 | 11.8±0.172234 | 12.42±0.66934 |
| HB-1533 | 565 ±54.523456 | 75.8± 0.81 | | 34.6±6.7212 | 66.3±1.6612 | 11.1±0.172123 | 13.18±0.6694 |
| Bekoji-I | 571 ±54.523456 | 77.8± 0.81234 | | 34.7±6.7212 | 70.5±1.6612 | 11.9±0.172234 | 11.54±0.6691234 |
| HB-120 | 578 ±54.5 3456 | 77.4± 0.8123 | | 44.6±6.721234 | 62.2±1.661 | 11.8±0.172234 | 11.85±0.669234 |
| Bahati | 585 ±54.53456 | 78.7± 0.81234 | | 47.9±6.721234 | 67.4±1.6612 | 11.6±0.1721234 | 12.2±0.66934 |
| Holker | 594 ±54.5456 | 78.2± 0.81234 | | 53±6.7212345 | 65.7±1.6612 | 11.2±0.172123 | 11.57±0.669234 |
| Suba | 597 ±54.5456 | 78.8± 0.81234 | | 40±6.72123 | 69.6±1.6612 | 11.6±0.172234 | 11.83±0.669234 |
| HB-1964 | 669 ±52.656 | 78.8± 0.81234 | | 43.5±6.831234 | 62.8±1.7212 | 11.0±0.17812 | 11.28±0.6751234 |
| M-21 | 677 ±54.56 | 76.2± 0.812 | | 39.5±6.72123 | 64.5±1.6612 | 10.7 ±0.1721 | 12.01±0.669234 |
| Ibon 174/03 | 706 ±54.56 | 77.6± 0.81234 | | 39.6±6.72123 | 67.7±1.6612 | 11.4 ±0.1721234 | 11.81±0.669234 |

Same numbers (within the column) indicates no significant difference in data expressed as means ±SD at p<0.05 according to Tukey test.

| **Cultivar** | **PH (m)** | **PL(cm)** | **NET** | **MD** | **HD** | **GW (cm)** | **SPS** | **1000.gw** | **YPP (g)** |
| --- | --- | --- | --- | --- | --- | --- | --- | --- | --- |
| Focus | 0.63±0.09123 | 0.31±0.131 | 5±0.01123 | 173±0c | 101±0g | 2.76 ±0.071 | 23.7±1.312 | 45.7± 3.912 | 489 ±11012 |
| Explorer | 0.58±0.091 | 0.33±0.131 | 8±0.01234 | 168±0b | 95±0c | 2.62±0.071 | 25.7±1.3123 | 41.6± 3.9712 | 276±11012 |
| Henerike | 0.59±0.0912 | 0.07±0.131 | 3±0.0112 | 183±0f | 97±0d | 2.75±0.071 | 21.0±1.31 | 57.6± 3.972 | 216±1101 |
| Planet | 0.67±0.091234 | 0.07±0.131 | 3±0.011 | 168±0b | 100±0f | 2.69±0.071 | 27.3±1.3123 | 46.8± 3.9712 | 492±11012 |
| Fatima | 0.59±0.0912 | 0.10±0.131 | 2±0.011 | 165±0a | 95±0c | 2.59±0.071 | 26.3±1.3123 | 44.7± 3.9712 | 317±11012 |
| Traveller | 0.63±0.09123 | 0.32±0.131 | 10±0.01456 | 168±0b | 92±0b | 2.65±0.071 | 25.0±1.3123 | 50.3± 3.9712 | 403±11012 |
| HB-52 | 1.06±0.0934567 | 0.12±0.131 | 15±0.01789 | 178±0d | 87±00 | 2.62±0.071 | 30.0±1.323 | 47.7± 3.9712 | 714±1102 |
| Proctor | 0.75±0.0912345 | 0.36±0.131 | 8±0.0134 | 168±0b | 102±0h | 2.68±0.071 | 28.7±1.323 | 34.0± 3.971 | 268±11012 |
| Sabin | 0.8±0.09123456 | 0.08 ±0.131 | 5±0.01123 | 112±02 | 69±02 | 2.62±0.071 | 25.3±1.3123 | 44.7± 3.9712 | 272±11012 |
| Grace | 0.73±0.0912345 | 0.08 ±0.131 | 10±0.01456 | 168±0b | 83±08 | 2.52±0.071 | 28.0±1.3123 | 52.3± 3.9712 | 587±11012 |
| EH-1847 | 1.04±0.0923456 | 0.08±0.131 | 9±0.01345 | 150±07 | 107±0i | 2.66±0.071 | 24.7±1.3123 | 46.9± 3.9712 | 490±11012 |
| HB-1963 | 1.09±0.094567 | 0.39±0.131 | 16±0.01890 | 138±06 | 86±09 | 2.63±0.071 | 27.0±1.3123 | 58.3± 3.972 | 719±1102 |
| Beka | 1.21±0.0967 | 0.09±0.131 | 35±0.01a | 181±0e | 98±0e | 2.65±0.071 | 31.0±1.33 | 53.7± 3.9712 | 676±11012 |
| HB-1533 | 1.02±0.091234567 | 0.08 ±0.131 | 10±0.01456 | 133±05 | 74±04 | 2.53±0.071 | 24.7±1.3123 | 46.8± 3.9712 | 486±11012 |
| Bekoji-I | 1.17±0.09567 | 0.07±0.131 | 19 ±0.0190 | 153±09 | 82±07 | 2.68±0.071 | 25.7±1.3123 | 57.3± 3.972 | 532±11012 |
| HB-120 | 1.14±0.09567 | 0.10±0.131 | 20±0.010 | 163±00 | 90±0a | 2.60±0.071 | 25.7±1.3123 | 55.9± 3.972 | 608±11012 |
| Bahati | 1.14±0.09567 | 0.07±0.131 | 15±0.01789 | 131±04 | 77±06 | 2.53±0.071 | 28.3±1.323 | 57.3± 3.972 | 531±11012 |
| Holker | 1.11±0.094567 | 0.07±0.131 | 8±0.0134 | 178±0d | 114±0j | 2.52±0.071 | 27.3±1.3123 | 52.7± 3.9712 | 352±11012 |
| Suba | 1.44±0.097 | 0.10±0.131 | 31±0.01a | 151±08 | 76±05 | 2.62±0.071 | 29.7±1.323 | 50.7± 3.9712 | 661±11012 |
| HB-1964 | 0.99±0.09123456 | 0.10±0.131 | 13±0.015678 | 122±03 | 72±03 | 2.62±0.071 | 25.7±1.3123 | 58.4± 3.972 | 520±11012 |
| M-21 | 0.93±0.09123456 | 0.08±0.131 | 11±0.014567 | 173±0c | 82±07 | 2.47±0.071 | 23.7±1.312 | 55.7± 3.972 | 447±11012 |
| Ibon174/03 | 0.82±0.09123456 | 0.33±0.131 | 14±0.01678 | 107±01 | 61±01 | 2.51±0.071 | 25.7±1.3123 | 54.7± 3.9712 | 738±1102 |

Table 5 Agromorphological traits performance of Ethiopian malt barley cultivars

Same lowercase letters or numbers (within the column) indicates no significant difference in data expressed as means ±SD at p<0.05 according to Tukey test
