# Supplementary material
Source: Research Square preprint supplement (doi:10.21203/rs.3.rs-7328143/v1)
Supplement: Supplementary file 2 [file ea6a9f10beac42d5104d24da.docx]

**Table 1** Malt quality linked SSR marker used for genotypic the cultivars.

| SSR marker | Trait | Chrom. Location | Forward sequence | Reverse sequence | No. of repeats | Product size | Ta | reference |
| --- | --- | --- | --- | --- | --- | --- | --- | --- |
| AWBMS80 | ME, Dp | 1HS | GCTTTCAGCATCTCAACTGCG | TGTATGCCAGGAAAACGGAACC | (CT)11 | 186 | 60°C | Hearnden et al. (2007) |
| Bmac90 | ME, Dp | 1HS | ACATCAACCCTCCTGCTC | CCGCACATAGTGGTTACATC | (AC)20 | 221 | 58°C | Wenzl et al. (2006) |
| EBmac501 | ME, Dp | 1HS | ACTTAAGTGCCATGCAAAG | AGGGACAAAAATGGCTAAG | (AC)13 | 151 | 58°C | Wenzl et al. (2006) |
| HVM2 | ME, Dp | 1HS | CAGGTGTCTAGTGGGTGCCT | TTACATACCAAGGAGCAATCCC | (GA)11 | 201 | 55°C | Liu et al.1996 |
| HVALAAT | ME, Dp | 1HS | TACATACAACCCTCATGGG | AAGGATGACATGGCTTTG | (CT)10 | 128 | 55°C | Wenzl et al. (2006); Pillen et al. (2000). |
| HVM20 | ME, Dp power | 1HS | CTCCACGAATCTCTGCACAA | CACCGCCTCCTCTTTCAC | (GA)19 | 510 | 55°C | Saghai Maroof et al. (1994) |
| Bmag692 | Malt extract | 2Hl | GCAAGGTATCTCTTGTATTTTG | TGGCATCTACAATCTAAAACA | (CT)19 | 182 | 55°C | Ramsay et al. (2000); |
| HVM36 | Malt extract | 2HS | TCCAGCCGACAATTTCTTG | AGTACTCCGACACCACGTCC | (GA)13 | 114 | 55°C | Saghai Maroof et al. (1994) |
| Bmac134 | Malt extract | 2Hs | CCAACTGAGTCGATCTCG | CTTCGTTGCTTCTCTACCTT | (AC)28 | 148 | 55°C | Varshney et al. (2007) |
| HVM54 | Malt extract | 2HL | AACCCAGTAACACCTGTCCTG | AGTTCCCTGACCCGATGTC | (GA)14 | 159 | 55°C | Saghai Maroof et al. (1994) |
| EBmac415 | Malt extract | 2HL | GAAACCCATCATAGCAGC | AAACAGCAGCAAGAGGAG | (AC)17 | 247 | 55°C | Ramsay et al.( 2000);Varshney et al. (2007) |
| EBmac541 | Diastatic power | 3HL | ACGGATCTACTTTAGCTAGCA | AAACAACCCCACACAATC | (AC)9 | 106 | 58°C | Varshney et al. (2007) |
| Bmag877 | Diastatic power | 3HL | AAAGCTCATGGTAGATCAAGA | TAGTTTTCCCAAAAGCTTCTA | (GA)15 | 153 | 55°C | Ramsay et al. (2000); |
| HVM67 | Diastatic power | 4HL | GTCGGGCTCCATTGCTCT | CCGGTACCCAGTGACGAC | (GA)11 | 116 | 55°C | Saghai Maroof et al. (1994) |
| HVM6 | ME, Dp | 5HL | CATGAATGAATGATTGGTTTTG | CGCATCCGTATGTATGAGTAA | (GA)9 | 175 | 55°C | Saghai Maroof et al. (1994) |
| GMS1 | ME, Dp | 5HL | CTGACCCTTTGCTTAACATGC | TCAGCGTGACAAACAATAAAGG | (CT)7 TTT(CT)27 | 134 | 60°C | Struss and Plieske ,(1998) |
| HvAMY2 | Diastatic power | 7HS | CTGTAAGTGAGACAATCGACA | CAGTTGAACCCCTGAAAG | (GCT)5 | 134 | 58°C | Ramsay et al. (2000); |
| HvBTAI3 | α-amylase inhibitor | 4HL | GCCGCAGTCTCCTCCTCTTG | ACTTGGCGAGGTATGGCTGC | (GCC)4 | 234 | 50°C | Pillen et al.(2000) |
| HdAMYB | ß-Amylase (Bmy1) | 4HL | GCACCAGACAGTTCACCCATA | CATATATGGTCTCCCGGAAGG | (TG)10 (G)15 | 219 | 50°C | Pillen et al. 2000; Ramsay et al. (2000). |

| HvBAMY | 5-Upsteam region of beta- amylase | 4HL | CAAGCAAAAGGTTAAAGGTG CC | TTGTCGAAACCCATCCGCTC | (AT)9 | 118-145 |  | Mei, et al.(2012) |
| --- | --- | --- | --- | --- | --- | --- | --- | --- |
| HVCMA | Alpha-amylase inhibitor | 7HL | GCCTCGGTTTGGACATATAA AG | GTAAAGCAAATGTTGAGCAACG | (AT)9 | 117-132 |  | Mei, et al.(2012) |
